# Supplementary material for: A comprehensive investigation of Ag7P3X11 (X = {O, S, and Se}) solid-state silver superionic conductors
Source: Royal Society of Chemistry journal article supplement (doi:10.1039/d4ta01341g), 2024-01-01
Supplement: d4ta01341g1.pdf [file d4ta01341g1.pdf]

**Electronic Supplementary Information (ESI) for:**

**A Comprehensive Investigation of  $\text{Ag}_7\text{P}_3\text{X}_{11}$  ( $\text{X} = \text{O}, \text{S},$  and  $\text{Se}$ ) Solid-State Silver Superionic Conductors.**

Amin Niksirat,<sup>a</sup> Maryam Soleimani,<sup>a</sup> Ali Lashani Zand,<sup>a</sup> and Mahdi Pourfath\*<sup>ab</sup>

<sup>a</sup> School of Electrical and Computer Engineering, College of Engineering, University of Tehran, Tehran 14395-515, Iran.

<sup>b</sup> Institute for Microelectronics, TU Wien, Gusshausstrasse 27-29, A-1040 Vienna, Austria.

E-mail: [pourfath@ut.ac.ir](mailto:pourfath@ut.ac.ir), [pourfath@iue.tuwien.ac.at](mailto:pourfath@iue.tuwien.ac.at)

† Electronic Supplementary Information (ESI) available: Thermal stability at 300 K for  $\text{Ag}_7\text{P}_3\text{X}_{11}$  ( $\text{X} = \{\text{O}, \text{S}$  and  $\text{Se}\}$ ) structures, Table of decomposition energy, The Radial Distribution Function, The snapshots of AIMD simulation and also the energy profiles(NEB). See DOI: 00.0000/00000000.

## Supplementary Note:

### 1. Stability

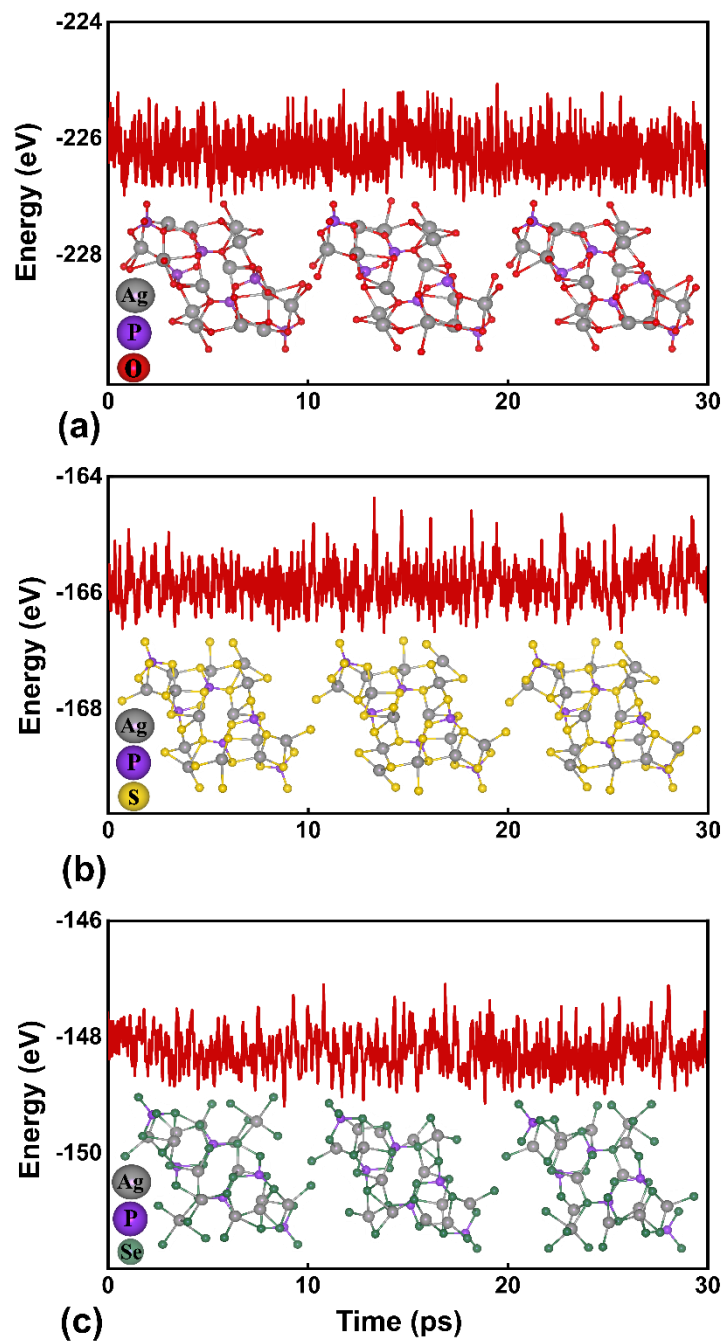

**Figure S1.** Investigation of thermal stability at 300 K. Energy variation as a function of time for (a)  $\text{Ag}_7\text{P}_3\text{O}_{11}$ , (b)  $\text{Ag}_7\text{P}_3\text{S}_{11}$ , (c)  $\text{Ag}_7\text{P}_3\text{Se}_{11}$ . Snapshots in each 10 ps are shown for each structure.

**Table S1.** Possible decomposition reactions and the corresponding energies for  $\text{Ag}_7\text{P}_3\text{X}_{11}$  ( $\text{X} = \text{O}, \text{S}, \text{and Se}$ ).

| Composition                           | $E_{\text{decomposition}}$ (meV/atom) | Possible decomposition reactions                             |
|---------------------------------------|---------------------------------------|--------------------------------------------------------------|
| $\text{Ag}_7\text{P}_3\text{O}_{11}$  | -4.02                                 | $\text{Ag}_3\text{PO}_4 + \text{Ag}_4\text{P}_2\text{O}_7$   |
|                                       | -8.58                                 | $\text{Ag}_3\text{PO}_4 + \text{AgPO}_3$                     |
|                                       | -23.85                                | $\text{Ag}_3\text{PO}_4 + \text{P}_2\text{O}_5$              |
|                                       | -71.93                                | $\text{Ag}_3\text{PO}_4 + \text{PO}_2 + \text{O}_2$          |
|                                       | -127.67                               | $\text{Ag}_3\text{PO}_4 + \text{P}_2\text{O}_3 + \text{O}_2$ |
| $\text{Ag}_7\text{P}_3\text{S}_{11}$  | 6.43                                  | $\text{Ag}_3\text{PS}_4 + \text{Ag}_4\text{P}_2\text{S}_7$   |
|                                       | 6.31                                  | $\text{Ag}_3\text{PS}_4 + \text{AgPS}_3$                     |
|                                       | 2.76                                  | $\text{Ag}_3\text{PS}_4 + \text{P}_2\text{S}_5$              |
|                                       | -1.11                                 | $\text{Ag}_3\text{PS}_4 + \text{P}_2\text{S}_3 + \text{S}$   |
|                                       | 71.21                                 | $\text{Ag}_3\text{PS}_4 + \text{PS} + \text{S}$              |
| $\text{Ag}_7\text{P}_3\text{Se}_{11}$ | -15.40                                | $\text{Ag}_3\text{PSe}_4 + \text{P}_2\text{S} + \text{S}$    |
|                                       | -16.56                                | $\text{Ag}_3\text{PSe}_4 + \text{Ag}_4\text{P}_2\text{Se}_7$ |
|                                       | 0.54                                  | $\text{Ag}_3\text{PSe}_4 + \text{AgPSe}_3$                   |
|                                       | 13.52                                 | $\text{Ag}_3\text{PSe}_4 + \text{P}_2\text{Se}_5$            |
|                                       | 18.87                                 | $\text{Ag}_3\text{PSe}_4 + \text{PSe} + \text{Se}$           |
|                                       | 11.22                                 | $\text{Ag}_3\text{PSe}_4 + \text{P}_2\text{Se} + \text{Se}$  |

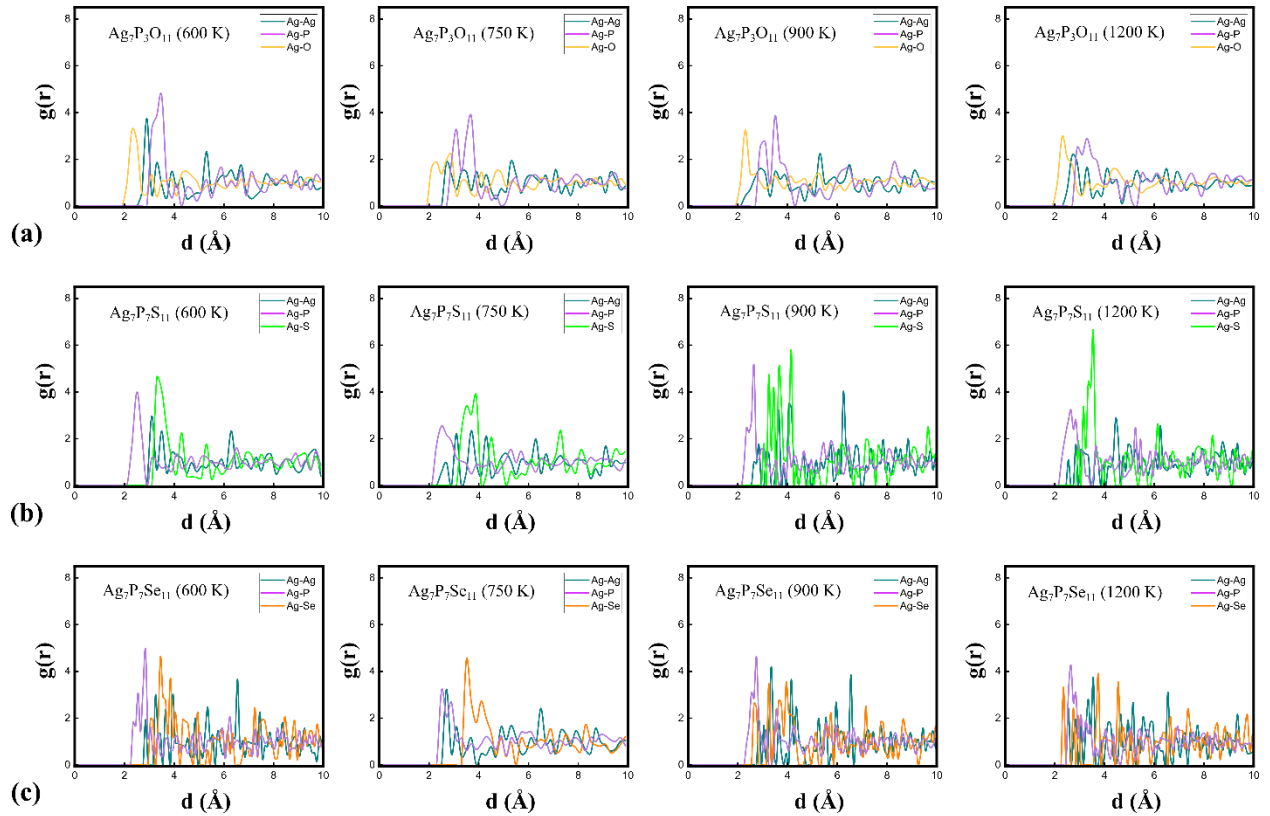

**Figure S2.** The radial distribution function  $g(r)$  at various temperatures (600 K, 750 K, 900 K, and 1200 K) for (a)  $\text{Ag}_7\text{P}_3\text{O}_{11}$ , (b)  $\text{Ag}_7\text{P}_3\text{S}_{11}$  and (c)  $\text{Ag}_7\text{P}_3\text{Se}_{11}$ .

## 2. Ionic Conductivity and Diffusivity

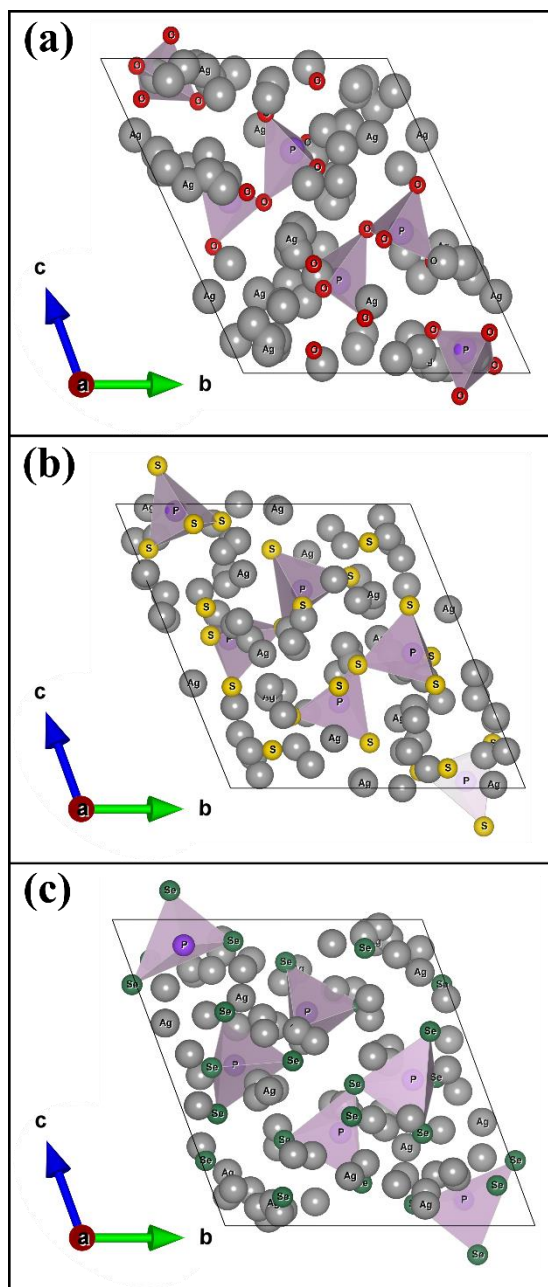

**Figure S3.** Structural snapshots of AIMD simulation of  $\text{Ag}^+$  ion diffusion at 1200 K at 45 ps for (a)  $\text{Ag}_7\text{P}_3\text{O}_{11}$ , (b)  $\text{Ag}_7\text{P}_3\text{S}_{11}$  and (c)  $\text{Ag}_7\text{P}_3\text{Se}_{11}$ .

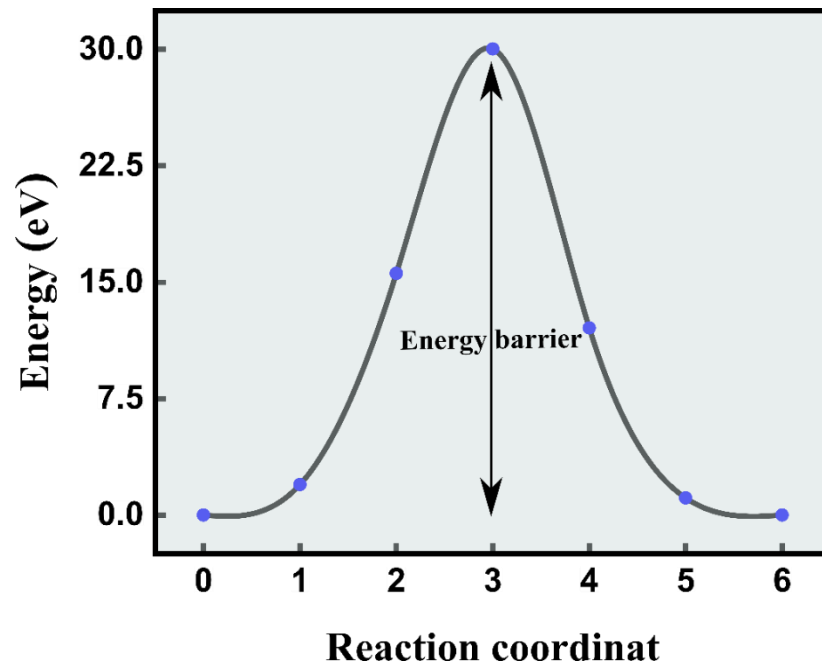

**Figure S4.** The energy barrier for the reaction paths of  $\text{Ag}^+$  ion migration, obtained by using nudged elastic band (NEB) method for  $\text{Ag}_7\text{P}_3\text{S}_{11}$  composition.
